# Supplementary material for: A mechanistic description of gating of the human cardiac ryanodine receptor in a regulated minimal environment
Source: PubMed Central journal article supplement — J Gen Physiol. 2012 Aug;140(2):139–58. doi: 10.1085/jgp.201110706 (PMC3409104; doi:10.1085/jgp.201110706), 2012-08
Supplement: supp_jgp.201110706_JGP_201110706_sm.pdf [file supp_jgp.201110706_JGP_201110706_sm.pdf]

Mukherjee et al., <http://www.jgp.org/cgi/content/full/jgp.201110706/DC1>

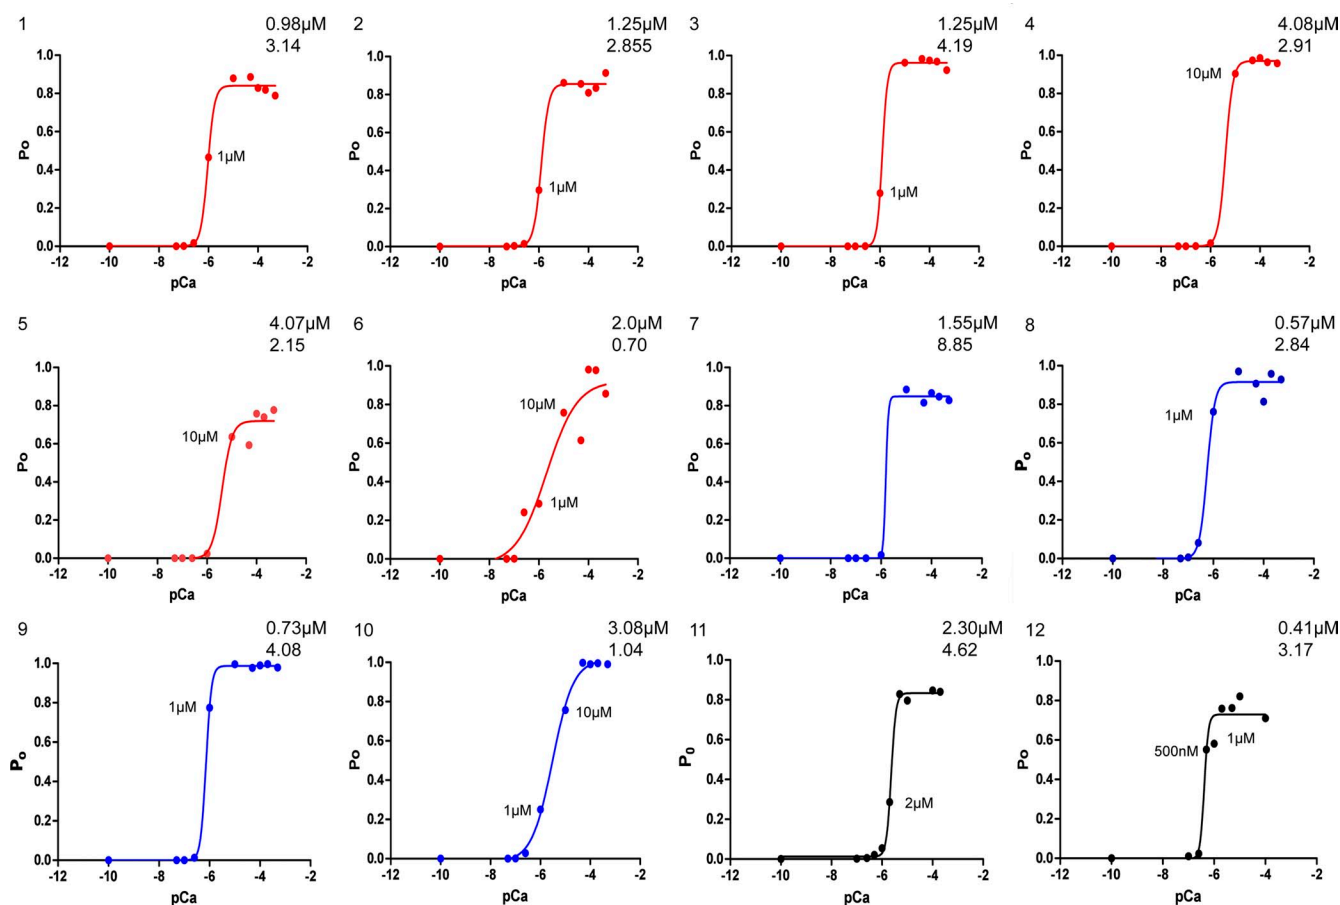

**Figure S1.**  $\text{Ca}^{2+}$  activation profiles for 12 hRyR2 channels (0–500  $\mu\text{M}$ ). These are color coded as follows: red, channels recorded at 0, 0.05, 0.1, 0.25, 1, 10, 50, 100, 200, and 500  $\mu\text{M}$   $[\text{Ca}^{2+}]_{\text{cys}}$ , which were all analyzed by MIL fitting; blue, channels recorded at the same concentrations as above, but data either showed periods of modal gating at  $P_o \geq 0.8$  resulting in increased  $T_o$  values (channels 8, 9, and 10; see Fig. 2 C in main text) or did not exhibit any intermediate open probabilities (channel 7) and were therefore not included in any further analysis; black, channels recorded at additional intermediate concentrations (0, 0.1, 0.25, 0.5, 1, 2, 5, 10, and 100  $\mu\text{M}$   $[\text{Ca}^{2+}]_{\text{cys}}$ , and 200  $\mu\text{M}$  for channel 11), which were also analyzed by MIL fitting. Individual  $\text{EC}_{50}$  and Hill coefficient measurements are given in each top right-hand corner.

| Actual data        |             | Model demonstrating ligand-dependent rates                                                                                                              | Simulated data |
|--------------------|-------------|---------------------------------------------------------------------------------------------------------------------------------------------------------|----------------|
| 200 $\mu\text{M}$  | $P_o$ 0.82  | $C_{NR} \rightleftharpoons C_R \rightleftharpoons O_1 \rightleftharpoons O_2 \rightleftharpoons O_3 \rightleftharpoons O_4$<br>$\downarrow$<br>$C_F$    | $P_o$ 0.8      |
|                    | $T_o$ 1.65  |                                                                                                                                                         | $T_o$ 1.5      |
|                    | $T_c$ 0.45  |                                                                                                                                                         | $T_c$ 0.4      |
| 100 $\mu\text{M}$  | $P_o$ 0.82  | $C_{NR} \rightleftharpoons C_R \rightleftharpoons O_1 \rightleftharpoons O_2 \rightleftharpoons O_3 \rightleftharpoons O_4$<br>$\downarrow$<br>$C_F$    | $P_o$ 0.79     |
|                    | $T_o$ 1.8   |                                                                                                                                                         | $T_o$ 1.2      |
|                    | $T_c$ 0.35  |                                                                                                                                                         | $T_c$ 0.4      |
| 1 $\mu\text{M}$    | $P_o$ 0.45  | $C_{NR} \rightleftharpoons C_R \rightleftharpoons O_1 \rightleftharpoons O_2 \rightleftharpoons O_3 \rightleftharpoons O_4$<br>$\downarrow$<br>$C_F$    | $P_o$ 0.42     |
|                    | $T_o$ 1.8   |                                                                                                                                                         | $T_o$ 1.5      |
|                    | $T_c$ 2.35  |                                                                                                                                                         | $T_c$ 0.7      |
| 0.25 $\mu\text{M}$ | $P_o$ 0.02  | $C_{NR} \rightleftharpoons C_R \rightleftharpoons O_1 \rightleftharpoons O_2 \rightleftharpoons O_3 \rightleftharpoons O_4$<br>$\downarrow$<br>$O_{UL}$ | $P_o$ 0.026    |
|                    | $T_o$ 0.35  |                                                                                                                                                         | $T_o$ 0.6      |
|                    | $T_c$ 18.75 |                                                                                                                                                         | $T_c$ 29       |

  

| Actual data        |              | Model demonstrating ligand-dependent rates                                                                                                              | Simulated data |
|--------------------|--------------|---------------------------------------------------------------------------------------------------------------------------------------------------------|----------------|
| 200 $\mu\text{M}$  | $P_o$ 0.815  | $C_{NR} \rightleftharpoons C_R \rightleftharpoons O_1 \rightleftharpoons O_2 \rightleftharpoons O_3 \rightleftharpoons O_4$<br>$\downarrow$<br>$C_F$    | $P_o$ 0.93     |
|                    | $T_o$ 1.75   |                                                                                                                                                         | $T_o$ 2.4      |
|                    | $T_c$ 0.45   |                                                                                                                                                         | $T_c$ 0.3      |
| 100 $\mu\text{M}$  | $P_o$ 0.82   | $C_{NR} \rightleftharpoons C_R \rightleftharpoons O_1 \rightleftharpoons O_2 \rightleftharpoons O_3 \rightleftharpoons O_4$<br>$\downarrow$<br>$C_F$    | $P_o$ 0.90     |
|                    | $T_o$ 1.7    |                                                                                                                                                         | $T_o$ 1.7      |
|                    | $T_c$ 0.4    |                                                                                                                                                         | $T_c$ 0.3      |
| 1 $\mu\text{M}$    | $P_o$ 0.339  | $C_{NR} \rightleftharpoons C_R \rightleftharpoons O_1 \rightleftharpoons O_2 \rightleftharpoons O_3 \rightleftharpoons O_4$<br>$\downarrow$<br>$C_F$    | $P_o$ 0.399    |
|                    | $T_o$ 1.75   |                                                                                                                                                         | $T_o$ 1.9      |
|                    | $T_c$ 3.35   |                                                                                                                                                         | $T_c$ 0.7      |
| 0.25 $\mu\text{M}$ | $P_o$ 0.0219 | $C_{NR} \rightleftharpoons C_R \rightleftharpoons O_1 \rightleftharpoons O_2 \rightleftharpoons O_3 \rightleftharpoons O_4$<br>$\downarrow$<br>$O_{UL}$ | $P_o$ 0.025    |
|                    | $T_o$ 0.45   |                                                                                                                                                         | $T_o$ 1.05     |
|                    | $T_c$ 34.1   |                                                                                                                                                         | $T_c$ 30.45    |

  

| Actual data        |             | Model demonstrating ligand-dependent rates                                                                                       | Simulated data |
|--------------------|-------------|----------------------------------------------------------------------------------------------------------------------------------|----------------|
| 200 $\mu\text{M}$  | $P_o$ 0.840 | $C_{NR} \rightleftharpoons C_R \rightleftharpoons O_1 \rightleftharpoons O_2 \rightleftharpoons O_3$<br>$\downarrow$<br>$C_F$    | $P_o$ 0.833    |
|                    | $T_o$ 1.95  |                                                                                                                                  | $T_o$ 1.0      |
|                    | $T_c$ 0.3   |                                                                                                                                  | $T_c$ 0.25     |
| 100 $\mu\text{M}$  | $P_o$ 0.846 | $C_{NR} \rightleftharpoons C_R \rightleftharpoons O_1 \rightleftharpoons O_2 \rightleftharpoons O_3$<br>$\downarrow$<br>$C_F$    | $P_o$ 0.814    |
|                    | $T_o$ 2.0   |                                                                                                                                  | $T_o$ 0.75     |
|                    | $T_c$ 0.5   |                                                                                                                                  | $T_c$ 0.3      |
| 1 $\mu\text{M}$    | $P_o$ 0.054 | $C_{NR} \rightleftharpoons C_R \rightleftharpoons O_1 \rightleftharpoons O_2 \rightleftharpoons O_3$<br>$\downarrow$<br>$C_F$    | $P_o$ 0.12     |
|                    | $T_o$ 0.5   |                                                                                                                                  | $T_o$ 1.5      |
|                    | $T_c$ 12.4  |                                                                                                                                  | $T_c$ 11.8     |
| 0.25 $\mu\text{M}$ | $P_o$ 0.021 | $C_{NR} \rightleftharpoons C_R \rightleftharpoons O_1 \rightleftharpoons O_2 \rightleftharpoons O_3$<br>$\downarrow$<br>$O_{UL}$ | $P_o$ 0.038    |
|                    | $T_o$ 0.45  |                                                                                                                                  | $T_o$ 1.275    |
|                    | $T_c$ 26.9  |                                                                                                                                  | $T_c$ 32.75    |

  

| Actual data        |               | Model demonstrating ligand-dependent rates                                                                                                              | Simulated data |
|--------------------|---------------|---------------------------------------------------------------------------------------------------------------------------------------------------------|----------------|
| 200 $\mu\text{M}$  | $P_o$         |                                                                                                                                                         | $P_o$          |
|                    | $T_o$ No data |                                                                                                                                                         | $T_o$ No data  |
|                    | $T_c$         |                                                                                                                                                         | $T_c$          |
| 100 $\mu\text{M}$  | $P_o$ 0.82    | $C_{NR} \rightleftharpoons C_R \rightleftharpoons O_1 \rightleftharpoons O_2 \rightleftharpoons O_3 \rightleftharpoons O_4$<br>$\downarrow$<br>$C_F$    | $P_o$ 0.83     |
|                    | $T_o$ 1.7     |                                                                                                                                                         | $T_o$ 0.9      |
|                    | $T_c$ 0.45    |                                                                                                                                                         | $T_c$ 0.35     |
| 1 $\mu\text{M}$    | $P_o$ 0.588   | $C_{NR} \rightleftharpoons C_R \rightleftharpoons O_1 \rightleftharpoons O_2 \rightleftharpoons O_3 \rightleftharpoons O_4$<br>$\downarrow$<br>$C_F$    | $P_o$ 0.36     |
|                    | $T_o$ 1.25    |                                                                                                                                                         | $T_o$ 1.45     |
|                    | $T_c$ 1.65    |                                                                                                                                                         | $T_c$ 1.1      |
| 0.25 $\mu\text{M}$ | $P_o$ 0.024   | $C_{NR} \rightleftharpoons C_R \rightleftharpoons O_1 \rightleftharpoons O_2 \rightleftharpoons O_3 \rightleftharpoons O_4$<br>$\downarrow$<br>$O_{UL}$ | $P_o$ 0.018    |
|                    | $T_o$ 0.3     |                                                                                                                                                         | $T_o$ 0.4      |
|                    | $T_c$ 12.9    |                                                                                                                                                         | $T_c$ 16.2     |

**Figure S2.** Dependence of backward as well as forward rates on ligand concentration denotes possible ligand-dependent inhibition at high  $[\text{Ca}^{2+}]_{\text{cyt}}$ . Panels show  $P_o$ ,  $T_o$ , and  $T_c$  from actual and simulated data. Simulations were performed using the 10- $\mu\text{M}$  model for four channels from Fig. S1: A, channel 1; B, channel 2; C, channel 11; D, channel 12 (where data at 200  $\mu\text{M}$   $[\text{Ca}^{2+}]_{\text{cyt}}$  was not available). All models apart from that in C achieve four ligand-bound open states. Rates shown in bold were constrained to be linearly dependent on ligand concentration, whereas the others remained fixed. At high  $[\text{Ca}^{2+}]_{\text{cyt}}$  (100–200  $\mu\text{M}$ ), making both forward and backward rates from  $C_R$  to  $O_3$  or  $O_4$  ligand dependent simulates data comparable to that acquired, suggesting inhibition at these concentrations. At intermediate  $[\text{Ca}^{2+}]_{\text{cyt}}$  (1  $\mu\text{M}$ ), ligand dependency of forward (from  $C_R$  to  $O_3$  or  $O_4$ ) and backward rates between open states only (i.e., from  $O_1$  to  $O_3$  or  $O_4$ ) simulates data similar to that obtained in practice. At low (0.25  $\mu\text{M}$ )  $[\text{Ca}^{2+}]_{\text{cyt}}$ , ligand dependence of forward rates (from  $C_R$  to  $O_3$  or  $O_4$ ) only simulates data comparable to that recorded. At this  $[\text{Ca}^{2+}]_{\text{cyt}}$ , the addition of  $O_{UL}$  (using fixed-rate constants from the individual channel, if this state was resolved, as in A, C, and D), and the removal of  $C_F$  further improved the match between actual and simulated data.
